# Supplementary material
Source: publisher figshare collection journal article supplement (https://acs.figshare.com/ndownloader/files/5701731)
Supplement: Supplementary file 1 [file 5701731]

## Supporting Information

### **Utilization of CS<sub>2</sub> as a Source of C<sub>1</sub> Chemistry for the Generation of Methyldithioformate**

Thirumanavelan Gandhi, Munirathinam Nethaji, and Balaji R. Jagirdar\*

*Department of Inorganic & Physical Chemistry, Indian Institute of*

*Science, Bangalore 560 012, India*

#### Contents

- I. Synthesis and characterization of the compounds
- II. Figure S1: Stack plot of the <sup>1</sup>H NMR spectra of the reaction of *trans*-[(dppe)<sub>2</sub>Ru(H)(SC(SCH<sub>3</sub>)H)][OTf] with H<sub>2</sub>; (a) *trans*-[(dppe)<sub>2</sub>Ru(H)(SC(SCH<sub>3</sub>)H)][OTf] complex; (b) *trans*-[(dppe)<sub>2</sub>Ru(H)(η<sup>2</sup>-H<sub>2</sub>)][OTf] complex
- III. Figure S2: Stack plot of the <sup>31</sup>P NMR spectra of the reaction of *trans*-[(dppe)<sub>2</sub>Ru(H)(SC(SCH<sub>3</sub>)H)][OTf] with H<sub>2</sub>; (a) *trans*-[(dppe)<sub>2</sub>Ru(H)(SC(SCH<sub>3</sub>)H)][OTf] complex; (b) *trans*-[(dppe)<sub>2</sub>Ru(H)(η<sup>2</sup>-H<sub>2</sub>)][OTf] complex
- IV. Figure S3: Stack plot of the <sup>1</sup>H NMR spectra of the reaction of *trans*-[(dppe)<sub>2</sub>Ru(H)(SC(SCH<sub>3</sub>)H)][OTf] with CH<sub>3</sub>CN; (a) *trans*-[(dppe)<sub>2</sub>Ru(H)(SC(SCH<sub>3</sub>)H)][OTf]; (b) *trans*-[(dppe)<sub>2</sub>Ru(H)(CH<sub>3</sub>CN)][OTf]; (c) CH<sub>3</sub>SC(S)H
- V. Figure S4: Stack plot of the <sup>31</sup>P NMR spectra of the reaction of *trans*-[(dppe)<sub>2</sub>Ru(H)(SC(SCH<sub>3</sub>)H)][OTf] with CH<sub>3</sub>CN; (a) *trans*-[(dppe)<sub>2</sub>Ru(H)(SC(SCH<sub>3</sub>)H)][OTf]; (b) *trans*-[(dppe)<sub>2</sub>Ru(H)(CH<sub>3</sub>CN)][OTf]

- VI. Figure S5: Stack plot of the  $^1\text{H}$  NMR spectra of the reaction of *trans*- $[(\text{dppe})_2\text{Ru}(\text{H})(\text{SC}(\text{S})\text{H})]$  with MeI; (a) *trans*- $[(\text{dppe})_2\text{Ru}(\text{H})(\text{SC}(\text{S})\text{H})]$ ; (b) *trans*- $[(\text{dppe})_2\text{Ru}(\text{H})(\text{SC}(\text{SCH}_3)\text{H})][\text{I}]$ ; (c) *trans*- $[(\text{dppe})_2\text{Ru}(\text{H})(\text{I})]$ ; (d)  $\text{CH}_3\text{SC}(\text{S})\text{H}$
- VII. Figure S6: Stack plot of the  $^{31}\text{P}$  NMR spectra of the reaction of *trans*- $[(\text{dppe})_2\text{Ru}(\text{H})(\text{SC}(\text{S})\text{H})]$  with MeI; (a) *trans*- $[(\text{dppe})_2\text{Ru}(\text{H})(\text{SC}(\text{S})\text{H})]$ ; (b) *trans*- $[(\text{dppe})_2\text{Ru}(\text{H})(\text{SC}(\text{SCH}_3)\text{H})][\text{I}]$ ; (c) *trans*- $[(\text{dppe})_2\text{Ru}(\text{H})(\text{I})]$
- VIII. Figure S7: IR spectrum ( $\text{CH}_2\text{Cl}_2$ ) of  $\text{CH}_3\text{SC}(\text{S})\text{H}$
- IX. Figure S8: Electronic spectrum ( $\text{CH}_2\text{Cl}_2$ ) of  $\text{CH}_3\text{SC}(\text{S})\text{H}$

## Experimental Section

### General Procedures.

All reactions were carried out under  $\text{N}_2$  or Ar atmosphere at room temperature using standard Schlenk<sup>1</sup> and inert-atmosphere techniques unless otherwise noted. Solvents were dried and distilled before use. The NMR spectra were obtained using an AMX Bruker or Avance Bruker 400 MHz spectrometer. The shift of the residual protons of the deuterated solvent was used as an internal reference. The  $^{31}\text{P}\{^1\text{H}\}$  NMR spectra were measured relative to 85%  $\text{H}_3\text{PO}_4$  (aqueous solution) as an external standard. Elemental analyses were carried out using a Heraeus CHNO Rapid elemental analyzer; samples containing fluorine atoms were characterized by mass spectral analysis (Electrospray MS). The *trans*- $[(\text{dppe})_2\text{Ru}(\text{H})(\text{SC}(\text{S})\text{H})]$  **1** complex was synthesized by a reported procedure.<sup>2</sup>

### Preparation of *trans*- $[(\text{dppe})_2\text{Ru}(\text{H})(\text{SC}(\text{SCH}_3)\text{H})][\text{OTf}]$ (**2**).

A solution of *trans*-[(dppe)<sub>2</sub>Ru(H)(SC(S)H)] (1.00 g, 1 mmol) in CH<sub>2</sub>Cl<sub>2</sub> (30 mL) was treated with 4 equiv of MeOTf (0.46 mL, 4 mmol). An immediate color change from yellow to orange was observed. The resulting solution was stirred for 15 min and then the volume was reduced to ca. 5 mL. The product *trans*-[(dppe)<sub>2</sub>Ru(H)(SC(SCH<sub>3</sub>)H)][OTf] **2** was precipitated by adding excess Et<sub>2</sub>O and the precipitate was washed with more Et<sub>2</sub>O (3 x 10 mL) and dried in vacuo. Yield 1.00 g (86.0 %). Characterization data for **2** are as follows. <sup>1</sup>H NMR (CDCl<sub>3</sub>): δ -12.74 (qnt, 1H, Ru-H, *J*(H,P) = 20.0 Hz); 2.29 and 2.82 (br s, 8H, PCH<sub>2</sub>CH<sub>2</sub>P); 2.48 (s, 3H, SCH<sub>3</sub>); 6.62-7.59 (m, 40H, Ph<sub>2</sub>PCH<sub>2</sub>CH<sub>2</sub>PPh<sub>2</sub>); 8.00 (s, 1H, HC(S)). <sup>31</sup>P{<sup>1</sup>H} NMR (CDCl<sub>3</sub>): δ 63.1 (s, 4P, Ph<sub>2</sub>PCH<sub>2</sub>CH<sub>2</sub>PPh<sub>2</sub>). <sup>13</sup>C{<sup>1</sup>H} NMR (CDCl<sub>3</sub>): δ 17.79 (s, SCH<sub>3</sub>); 33.29 (qnt, Ph<sub>2</sub>PCH<sub>2</sub>CH<sub>2</sub>PPh<sub>2</sub>, *J*(C,P) = 12 Hz); 128.01-133.30 (m, Ph<sub>2</sub>PCH<sub>2</sub>CH<sub>2</sub>PPh<sub>2</sub>); 135.76 (unres br s, CF<sub>3</sub>SO<sub>3</sub>); 213.48 (s, HC(S)). MS (ESMS) *m/z*: 991 (P<sup>+</sup> of cation); 913 (P<sup>+</sup>-HC(S)SH).

#### Reaction of *trans*-[(dppe)<sub>2</sub>Ru(H)(SC(SCH<sub>3</sub>)H)][OTf] with H<sub>2</sub>

The *trans*-[(dppe)<sub>2</sub>Ru(H)(SC(SCH<sub>3</sub>)H)][OTf] complex (20 mg, 0.017 mmol) was dissolved in CDCl<sub>3</sub> (0.7 mL) in a 5 mm NMR tube and then H<sub>2</sub> gas was purged through the solution for ca. 5 min. The resulting solution was analyzed using NMR spectroscopy which indicated the partial formation of a hydride dihydrogen complex *trans*-[(dppe)<sub>2</sub>Ru(H)(η<sup>2</sup>-H<sub>2</sub>)][OTf]<sup>3</sup> **3** and some free methyldithioformate.

#### Reaction of *trans*-[(dppe)<sub>2</sub>Ru(H)(SC(SCH<sub>3</sub>)H)][OTf] with CH<sub>3</sub>CN

A CH<sub>2</sub>Cl<sub>2</sub> solution (10 mL) of *trans*-[(dppe)<sub>2</sub>Ru(H)(SC(SCH<sub>3</sub>)H)][OTf] (0.05 g, 0.043 mmol) was treated with 4 equiv of CH<sub>3</sub>CN (9 μL, 0.17 mmol) and the resulting solution was stirred for 1 h at room temperature. During this time, the color of the solution turned from orange to yellow. The volume of the solution was reduced and the

product of *trans*-[(dppe)<sub>2</sub>Ru(H)(CH<sub>3</sub>CN)][OTf] **4** was precipitated by the addition of excess Et<sub>2</sub>O. The solid was vacuum dried. Yield 0.03 g (63 %). Characterization data for **4** are as follows. <sup>1</sup>H NMR (CDCl<sub>3</sub>): δ -15.96 (qnt, 1H, Ru-*H*, *J*(H,P) = 18.0 Hz); 1.80 (s, 3H, CH<sub>3</sub>CN); 2.06 and 2.64 (br s, 8H, PCH<sub>2</sub>CH<sub>2</sub>P); 6.61-7.41 (m, 40H, Ph<sub>2</sub>PCH<sub>2</sub>CH<sub>2</sub>PPh<sub>2</sub>). <sup>31</sup>P{<sup>1</sup>H} NMR (CDCl<sub>3</sub>): δ 65.1 (s, 4P, Ph<sub>2</sub>PCH<sub>2</sub>CH<sub>2</sub>PPh<sub>2</sub>). <sup>13</sup>C{<sup>1</sup>H} NMR (CDCl<sub>3</sub>): δ 3.65 (s, CH<sub>3</sub>CN); 32.37 (qnt, Ph<sub>2</sub>PCH<sub>2</sub>CH<sub>2</sub>PPh<sub>2</sub>, *J*(C,P) = 12 Hz); 123.68 (s, CH<sub>3</sub>CN); 134.45 (unres br s, CF<sub>3</sub>SO<sub>3</sub>). MS (ESMS) *m/z*: 913 (P<sup>+</sup>-HCN); 897 (P<sup>+</sup>-(HCN+CH<sub>4</sub>)).

### Isolation of free MeSC(S)H

A reaction of *trans*-[(dppe)<sub>2</sub>Ru(H)(SC(SCH<sub>3</sub>)H)][OTf] (0.70 g, 0.61 mmol) with 7 equiv of CH<sub>3</sub>CN (0.22 mL) was carried as described above. Upon ensuring that the reaction was complete (color change from orange to pale yellow), the volatiles were fractionally distilled and the fractions boiling at 45-46 °C, 55-56 °C, and 65-66 °C were collected separately. The fraction collected at 55-56 °C contained considerable amount of free methyldithioformate. The NMR spectral details of this fraction matched those obtained in the NMR scale experiments.

### Reaction of *trans*-[(dppe)<sub>2</sub>Ru(H)(SC(S)H)] with MeI

To a CH<sub>2</sub>Cl<sub>2</sub> solution (5 mL) of *trans*-[(dppe)<sub>2</sub>Ru(H)(SC(S)H)] (0.100 g, 0.1 mmol) was added 5 equiv of MeI (32 μL, 0.5 mmol) and the resulting solution was stirred for 2 h. The yellow solution turned red. Then the volume of the solution was reduced to ca. 2 mL and excess Et<sub>2</sub>O was added to cause complete precipitation of a product of *trans*-[(dppe)<sub>2</sub>Ru(H)I] **5** that was dried in vacuo. Yield 0.080 g (76 %). Characterization data for **5** are as follows. <sup>1</sup>H NMR (CDCl<sub>3</sub>): δ -16.24 (qnt, 1H, Ru-*H*,

$J(\text{H,P}) = 20.0 \text{ Hz}$ ; 2.14 and 2.77 (br s, 8H,  $\text{PCH}_2\text{CH}_2\text{P}$ ); 6.95-7.25 (m, 40H,  $\text{Ph}_2\text{PCH}_2\text{CH}_2\text{PPh}_2$ ).  $^{31}\text{P}\{^1\text{H}\}$  NMR ( $\text{CDCl}_3$ ):  $\delta$  59.97 (s, 4P,  $\text{Ph}_2\text{PCH}_2\text{CH}_2\text{PPh}_2$ ). MS (ESMS)  $m/z$ : 997 ( $\text{P-C}_2\text{H}_4$ ).

**Reaction of *trans*-[(dppe)<sub>2</sub>Ru(H)I] with excess NaBH<sub>4</sub>**

The *trans*-[(dppe)<sub>2</sub>Ru(H)I] (0.10 g, 0.097 mmol) was dissolved in a mixture of THF (10 mL) and methanol (5 mL). Under nitrogen pressure, excess NaBH<sub>4</sub> (0.46 g, 12.12 mmol) was added all at once with vigorous stirring. The solution turned color from brown to pale yellow in ca. an hour after which time, the volatiles were removed in vacuo and the residual solid was washed several times with methanol. The solid that was left behind was dried in vacuo and identified using NMR spectroscopy as *cis*-[(dppe)<sub>2</sub>RuH<sub>2</sub>]. Yield 0.042 g (48 %). Anal. Calcd. for C<sub>52</sub>H<sub>50</sub>P<sub>4</sub>Ru: C, 69.43; H, 5.56. Found: C, 68.91; H, 5.24.

**Reaction of *trans*-[(dppe)<sub>2</sub>Ru(H)(SC(SCH<sub>3</sub>)H)][OTf] with excess NaBH<sub>4</sub>**

The *trans*-[(dppe)<sub>2</sub>Ru(H)(SC(SCH<sub>3</sub>)H)][OTf] (0.05 g, 0.043 mmol) was dissolved in a mixture of THF (20 mL) and methanol (10 mL). Under N<sub>2</sub> pressure, excess NaBH<sub>4</sub> (0.20 g, 125 equiv, 5.3 mmol) was added with vigorous stirring. After 1 h of stirring, the solution turned color from orange to pale yellow. The solvents were removed in vacuo and the residual solid was washed several times with methanol. The product was identified as *cis*-[(dppe)<sub>2</sub>RuH<sub>2</sub>] by comparing its  $^1\text{H}$  and  $^{31}\text{P}\{^1\text{H}\}$  NMR spectral data with that of an authentic sample and from the literature.<sup>3</sup> Yield 0.026 g (68 %). Anal. Calcd. for C<sub>52</sub>H<sub>50</sub>P<sub>4</sub>Ru: C, 69.43; H, 5.56. Found: C, 68.89; H, 5.09.

## References

1. (a) Shriver, D.F.; Drezdon, M.A. *The Manipulation of Air-Sensitive Compounds*, 2<sup>nd</sup> ed.; Wiley: New York, 1986.  
  
(b) Herzog, S.; Dehnert, J.; Luhder, K. In *Techniques of Inorganic Chemistry*; Johnassen, H.B., Ed.; Interscience: New York, 1969; Vol. VII.
2. Gandhi, T.; Nethaji, M.; Jagirdar, B.R. *Inorg. Chem.* **2003**, 42, 667-669.
3. *trans*-[(dppe)<sub>2</sub>Ru(H)( $\eta^2$ -H<sub>2</sub>)] [BF<sub>4</sub>]: Bautista, M. T.; Cappellani, E. P.; Drouin, S. D.; Morris, R. H.; Schweitzer, C. T.; Sella, A.; Zubkowski, J. *J. Am. Chem. Soc.* **1991**, 113, 4876-4887.

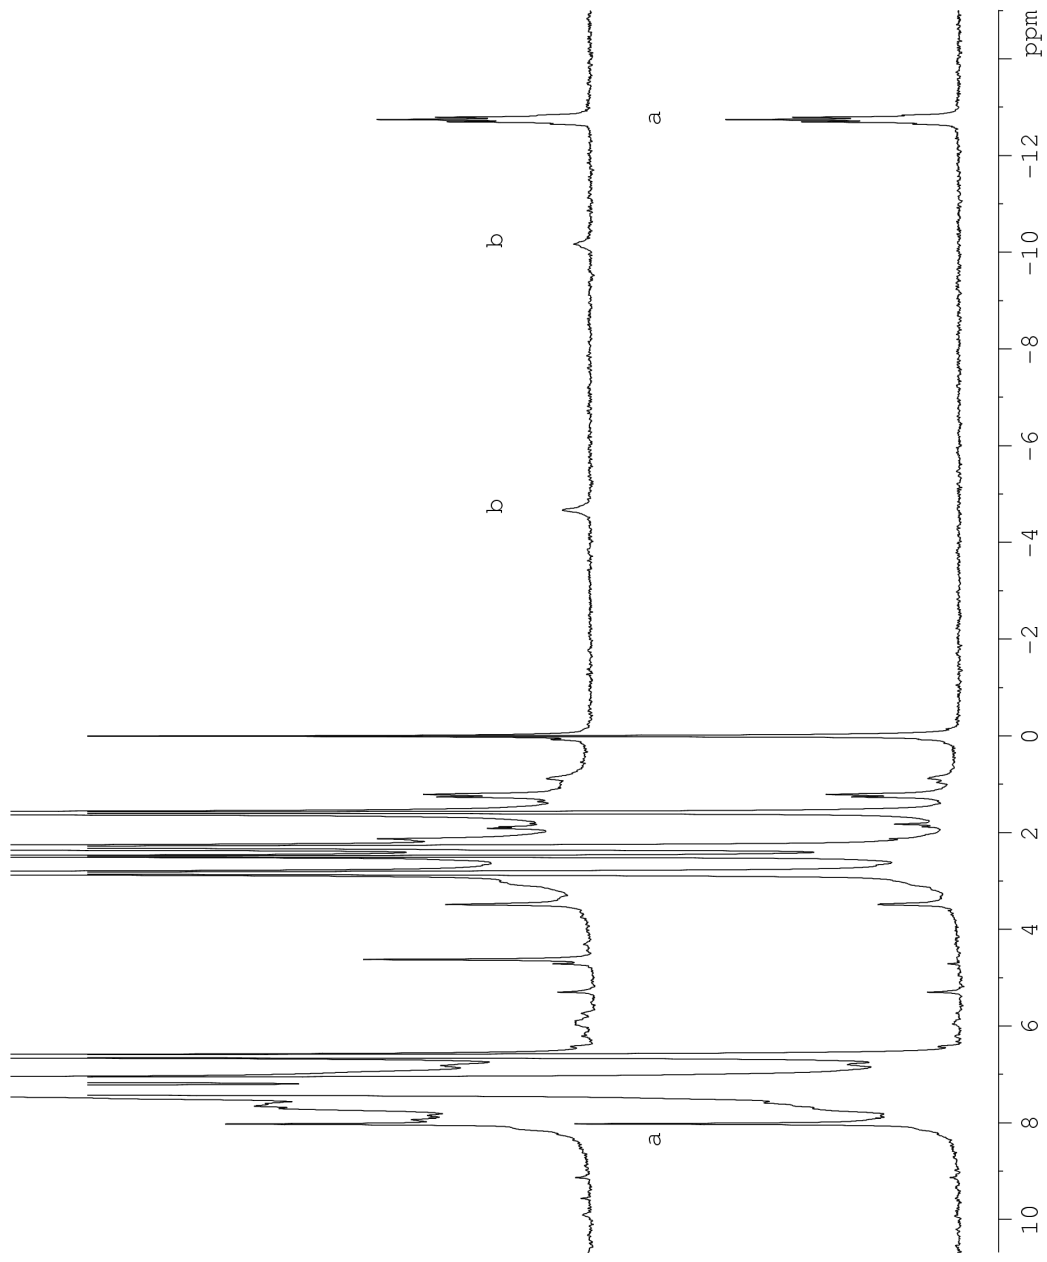

FIG. S1

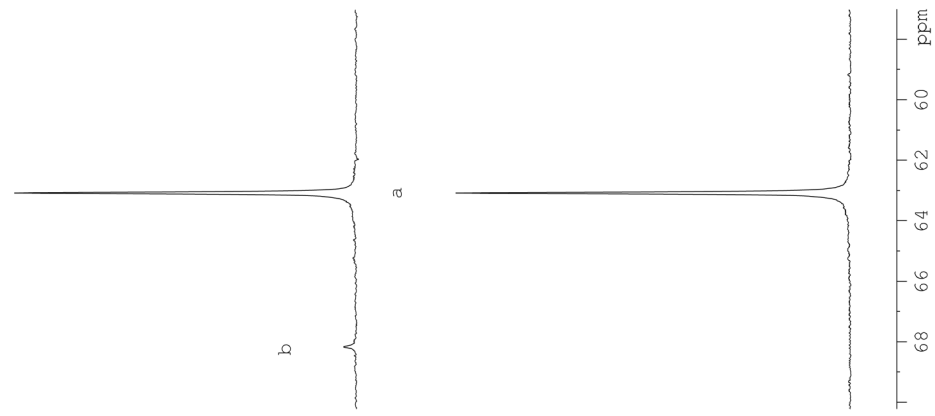

FIG. S2



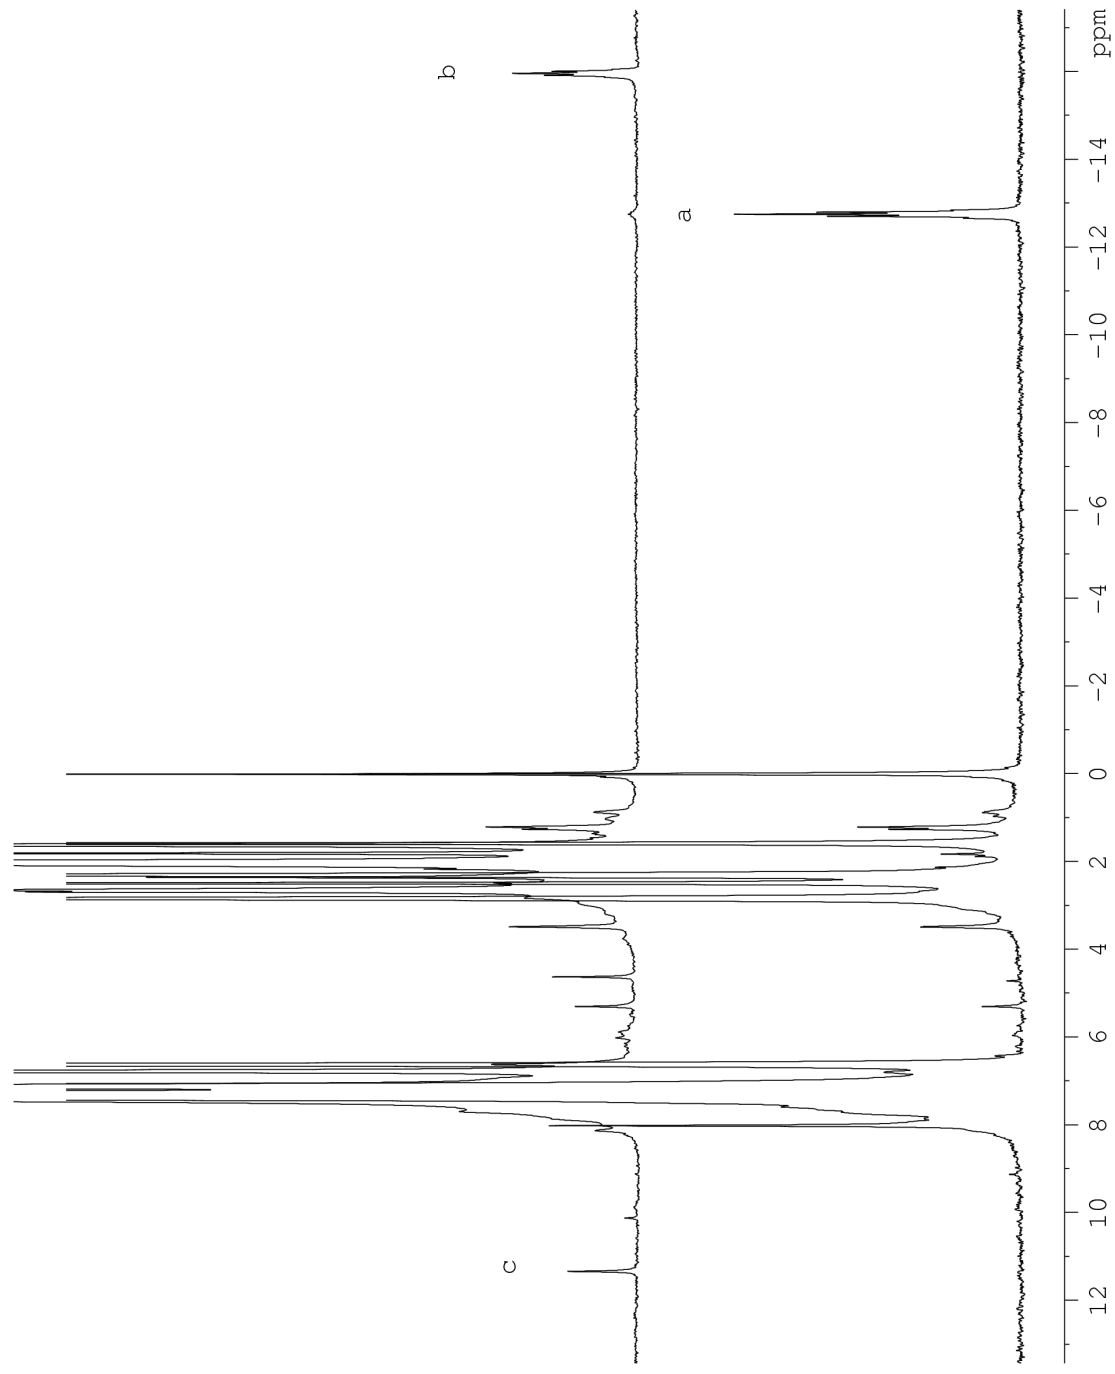

FIG. S3

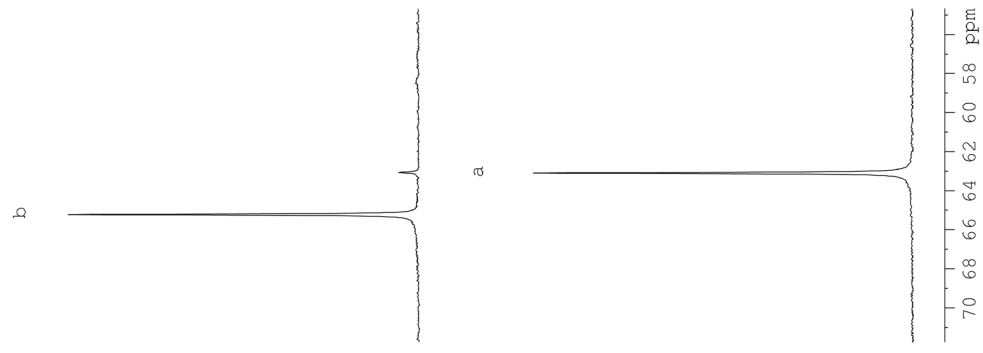

FIG. S4

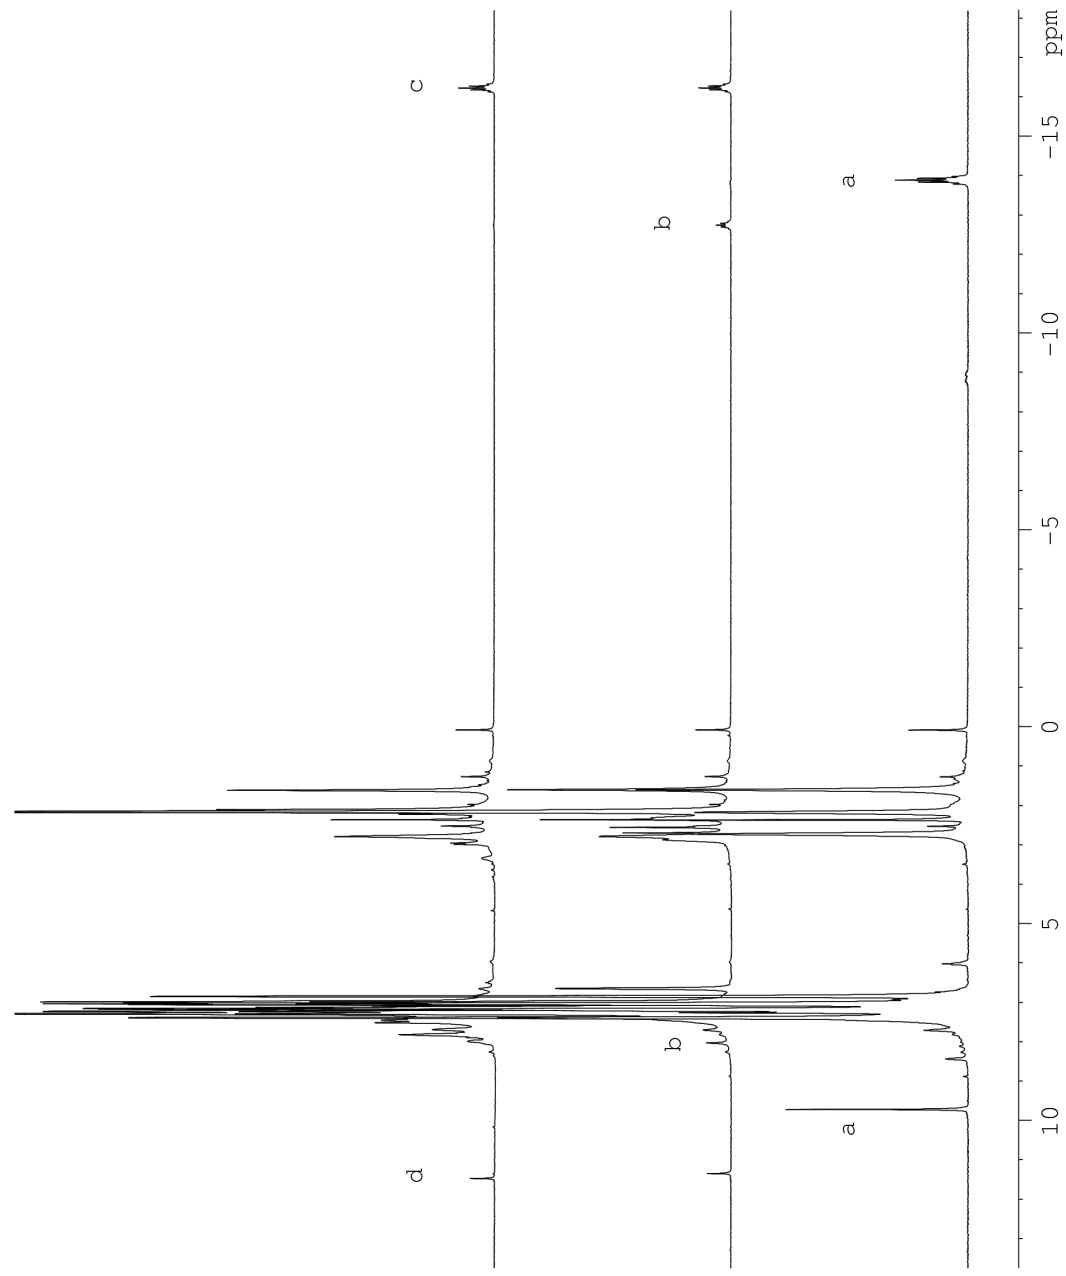

FIG. S5

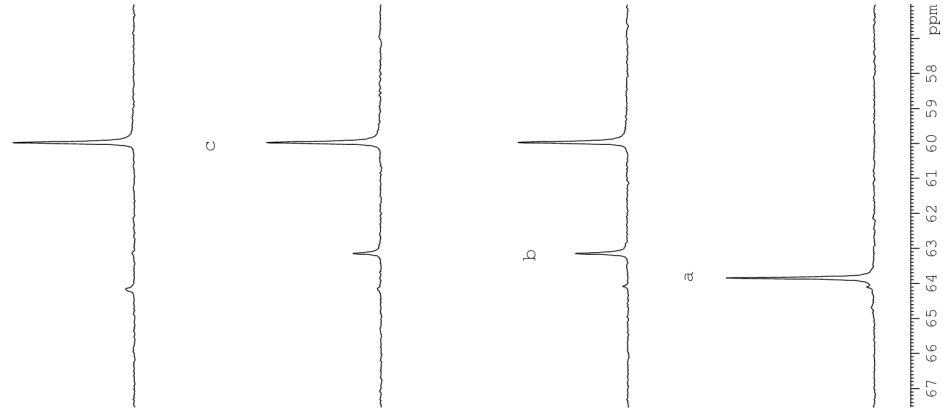

FIG. S6

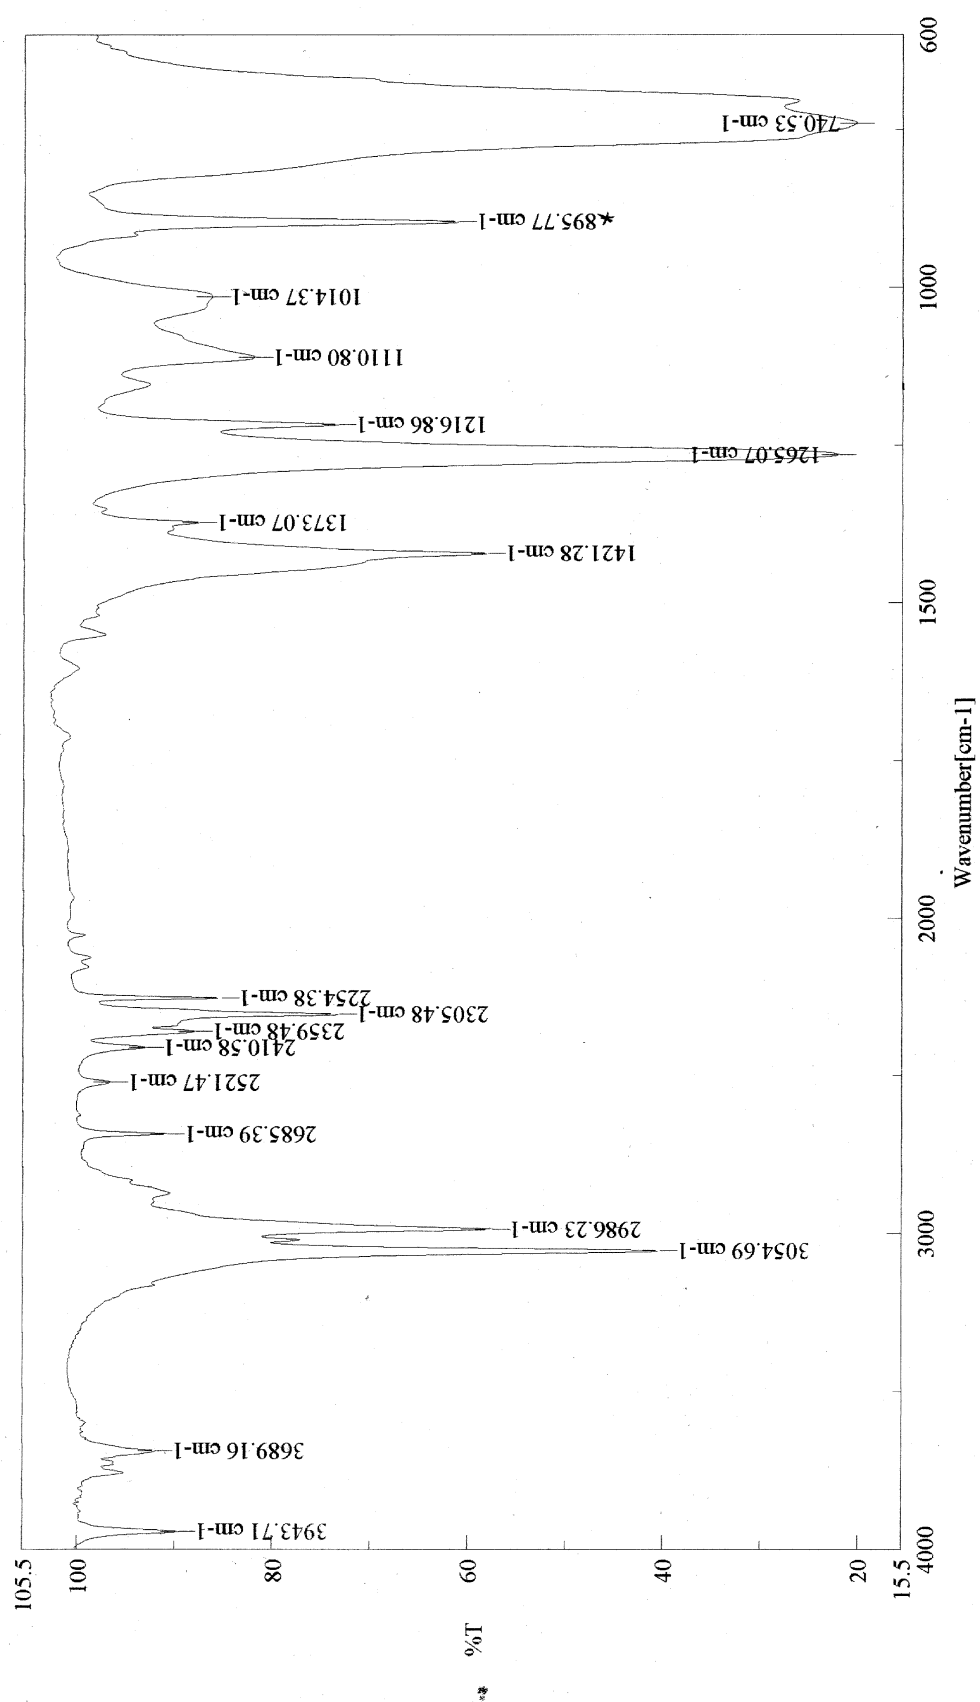

FIG. S7

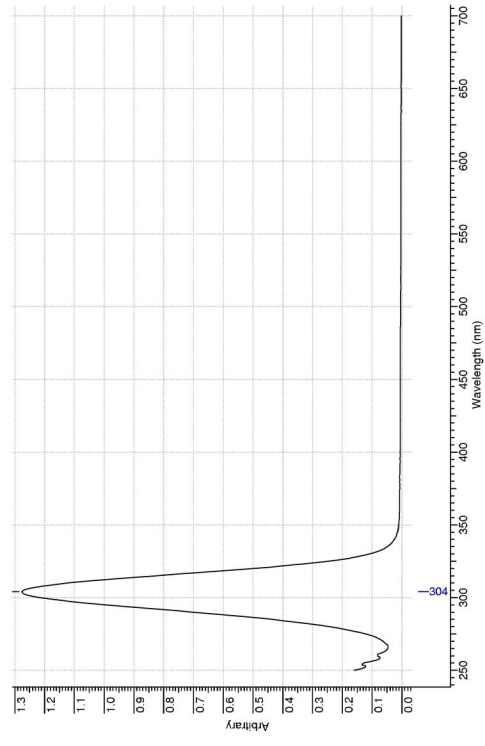

FIG. S8
